# Supplementary material for: Patronus is the elusive plant securin, preventing chromosome separation by antagonizing separase
Source: PubMed Central journal article supplement — Proc Natl Acad Sci U S A. 2019 Jul 19;116(32):16018–27. doi: 10.1073/pnas.1906237116 (PMC6690013; doi:10.1073/pnas.1906237116), 2019-07-19
Supplement: pnas.1906237116.sapp.pdf [file pnas.1906237116.sapp.pdf]

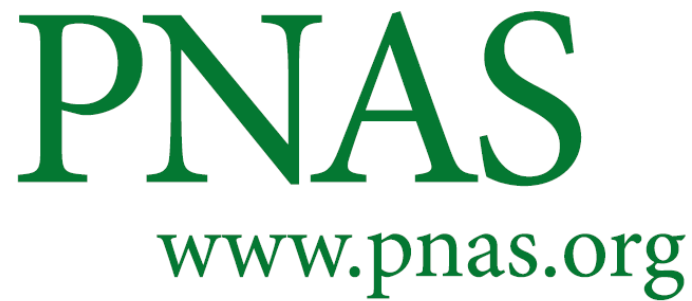

## Supplementary Information for

Patronus is the elusive plant securin, preventing chromosome separation by antagonizing separase

Laurence Cromer, Sylvie Jolivet, Dipesh Kumar Singh, Floriane Berthier, Nancy De Winne, Geert De Jaeger, Shinichiro Komaki, Maria Ada Prusicki, Arp Schnittger, Raphael Guérois and Raphael Mercier

Raphael Mercier Email: [raphael.mercier@inra.fr](mailto:raphael.mercier@inra.fr)

### **This PDF file includes:**

Figs. S1 to S6  
Tables S1 to S5

### **Other supplementary materials for this manuscript include the following:**

Movies S1 to S3

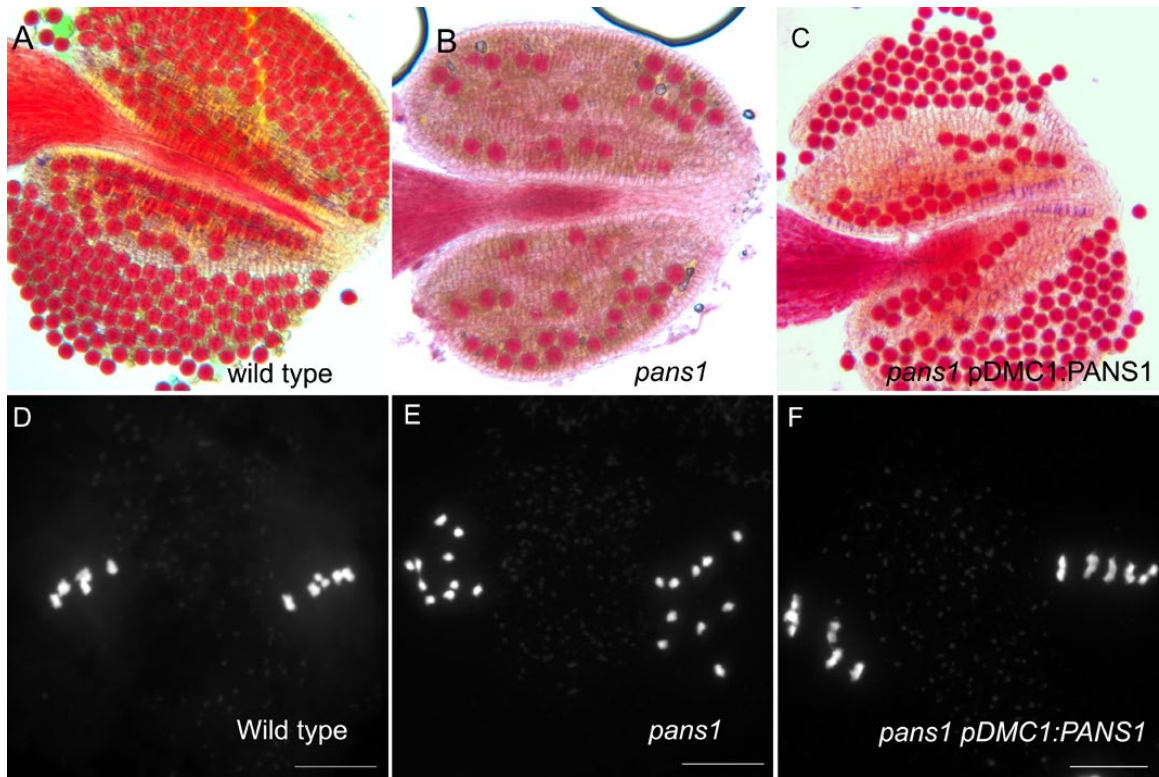

**Figure S1. *pDMC1::PANS1* complements the *pans1* mutant**

(A-C) Alexander staining of anthers, with viable pollen appearing in red. In contrast to the wild type (A), a large proportion of pollen grains were dead in *pans1* anthers (B). *pans1* plants transformed by *pDMC1::PANS1* (C) have restored pollen viability (n=2/4). (D-F) Chromosome spreads at metaphase II. In the wild type (D), the two metaphase plates contain five pairs of chromatids. In *pans1* (E), the two metaphase plates contain ten free chromatids. In *pans1* transformed by *pDMC1::PANS1* (F), chromatid cohesion is restored (n=2/4).

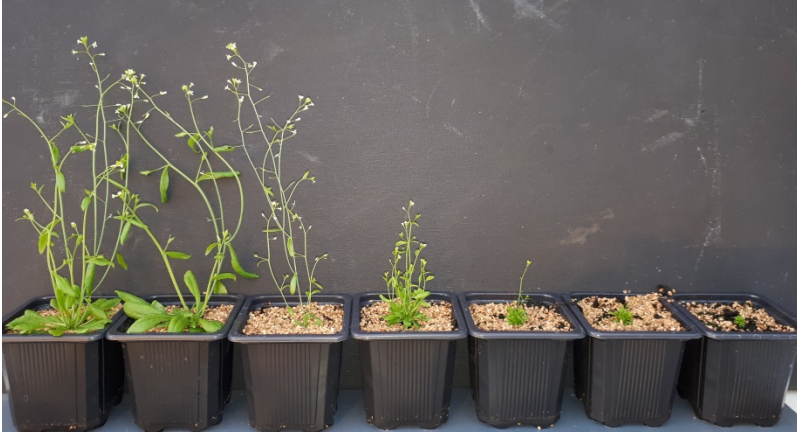

**FIGURE S2. *pDMC1::PANS1ΔD* have variable growth defects**

*pDMC1::PANS1ΔD* was transformed in wild type. These seven primary transformants were grown in parallel for five weeks, and show a range of growth defects.







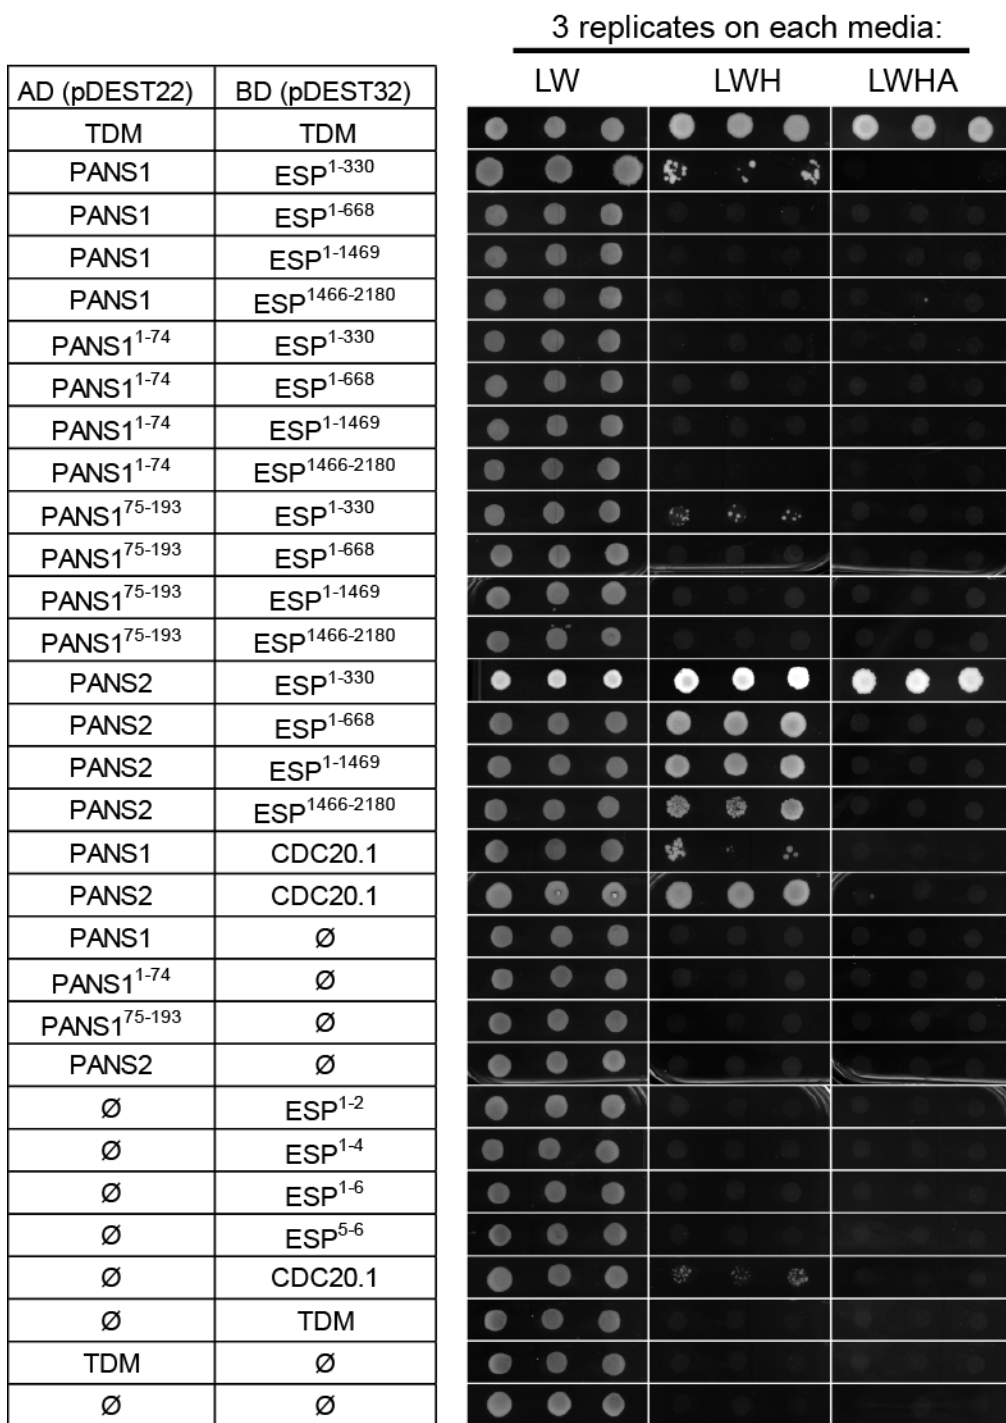

**Figure S4. Yeast two-hybrid assays**

Proteins of interest were fused with the GAL4 activating domain (AD) or the GAL4 binding domain (BD). TDM self-interaction was used as positive controls (Cifuentes et al., 2016). Protein interactions were assayed by growing diploid cells on SD-LW (control), SD-LWH (weak interaction) and SD-LWHA (strong interaction).

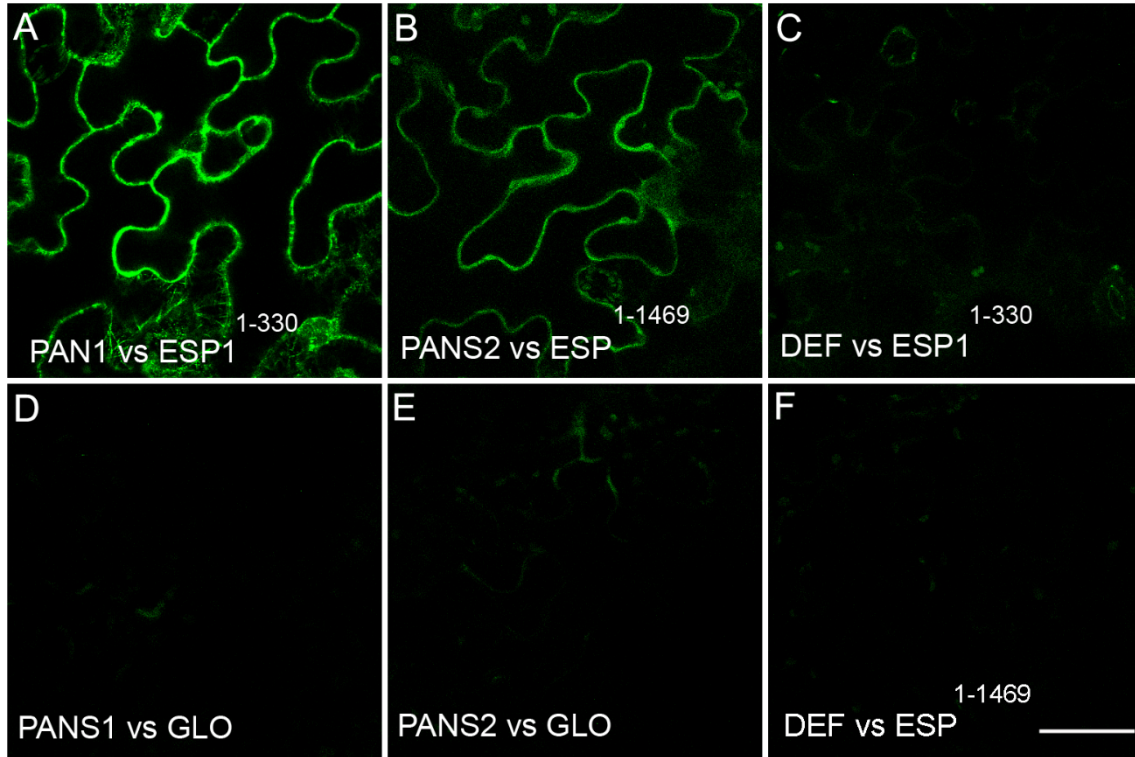

**FIGURE S5. Bimolecular fluorescence complementation (BiFC)**

Protein interactions were tested using BiFC assays in leaf epidermal cells of *Nicotiana benthamiana* plants. (A) Expression of pBIF2-PANS1 and pBIP3-ESP1<sup>1-330</sup> results in a nuclear YFP signal. (B) Expression of pBIF2-PANS2 and pBIP3-ESP1<sup>1-1469</sup> results in a nuclear YFP signal. The four corresponding negative controls (C) pBIF2-DEF/pBIP3-ESP1<sup>1-330</sup>, (D) pBIF2-PANS1/pBIP3-GLO, (E) pBIF2-PANS2/pBIP3-GLO and (F) pBIF2-DEF/pBIP3-ESP1<sup>1-1469</sup> do not generate YFP signals. GLOBOSA (GLO) and DEFICIENS (DEF) are two interacting components of the *Anthirrium majus* MADS box transcription factor. Scale bar=50  $\mu$ m.



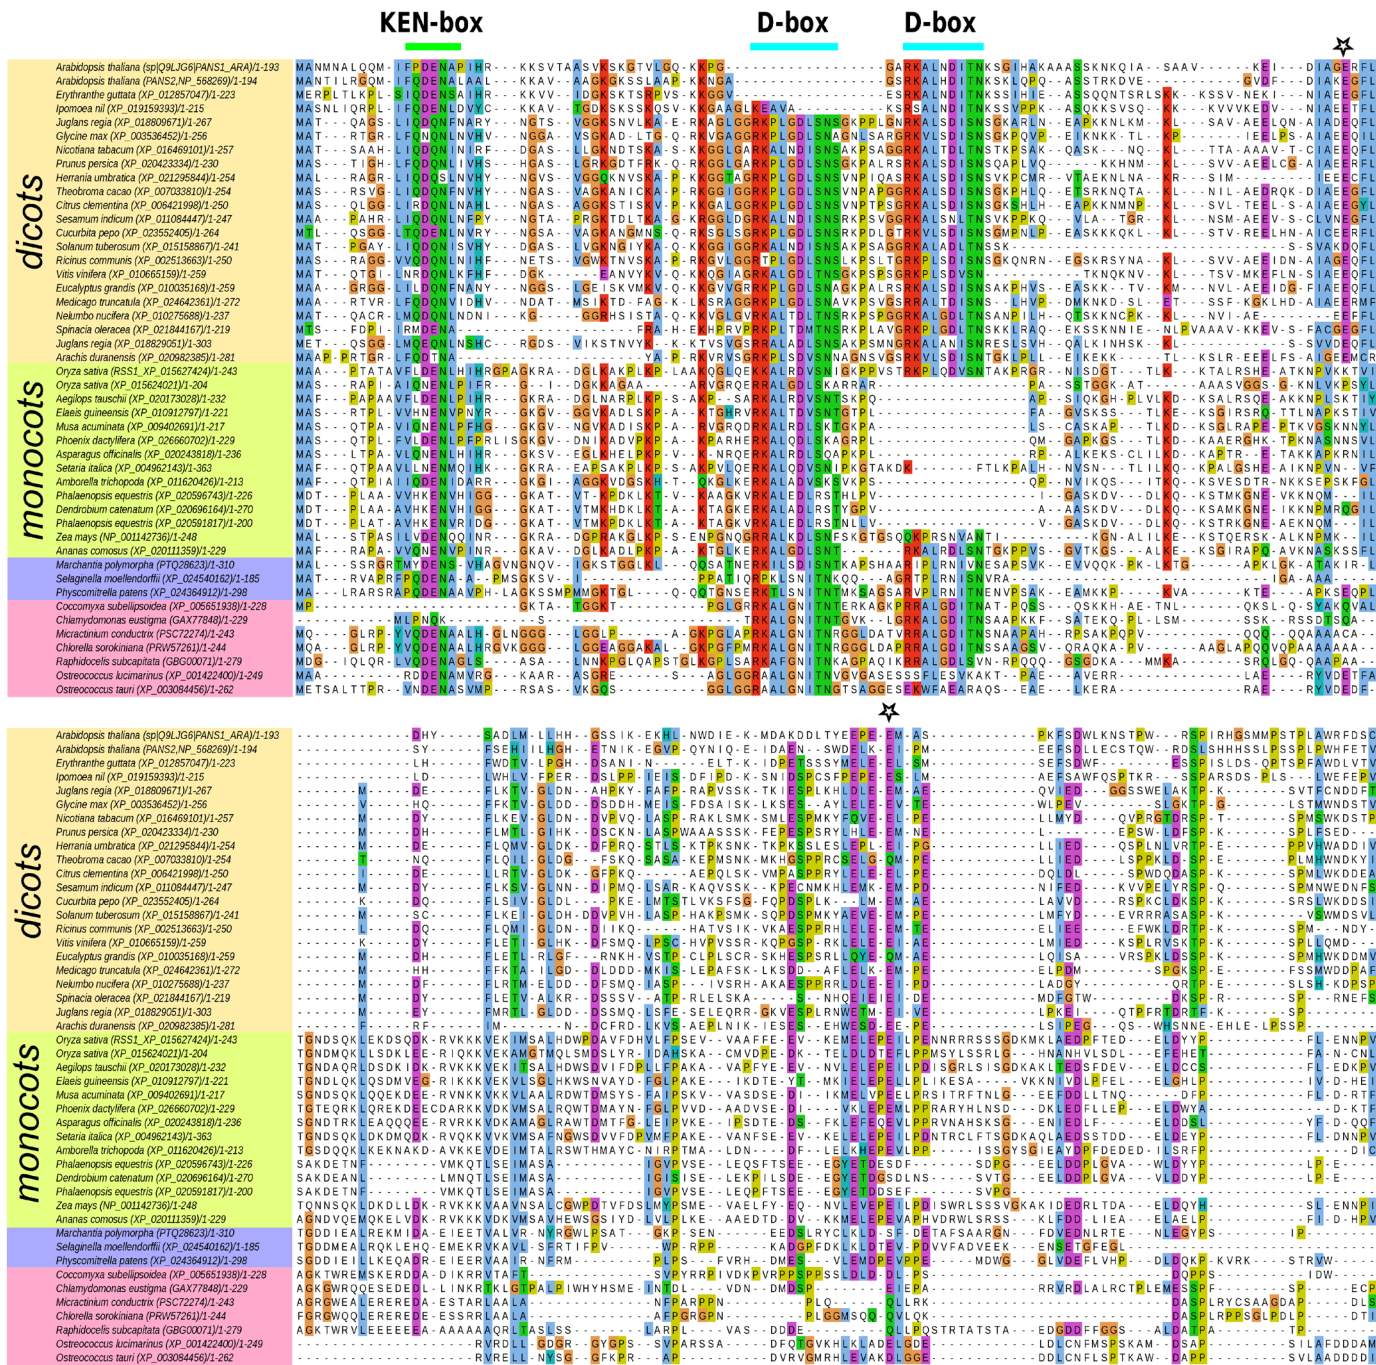

**FIGURE S6. Multiple sequence alignment of PANS1 homologs in plants**  
 Multiple sequence alignment of the homologs of AtPANS1 in plants built from the full-length sequences retrieved after the PSI-BLAST procedure described in Methods, realigned using MAFFT algorithm and represented using Jalview. Headers are coloured with respect to the clade to which the species belong (i.e. with dicots, monocots, mosses or green algae in yellow, green purple and pink, respectively). For the sake of concision, the columns of the alignment containing gaps in AtPANS1 and OsRSS1 sequences were trimmed.

| Name of original mutant | Number of candidate mutations in the line | Genomic mutation in <i>ESP</i> (TAIR10) | Amino acid change in <i>ESP</i> |
|-------------------------|-------------------------------------------|-----------------------------------------|---------------------------------|
| <i>spans25</i>          | 206                                       | Chr4: 12040670 C>T                      | S606N                           |
| <i>spans41</i>          | 201                                       | Chr4:12034602 G>A                       | P1946L                          |
| <i>spansD22</i>         | 62                                        | Chr4:12034107 C>T                       | A2047T                          |
| <i>spansC4</i>          | 389                                       | Chr4:12033780 G>A                       | P2156S                          |

**Table S1. ESP mutations identified in this study**

| genotype of the progeny |              | Expected % | Expected % if gametophyte lethal | observed % (n) in the progeny of: |                                           |                                          |
|-------------------------|--------------|------------|----------------------------------|-----------------------------------|-------------------------------------------|------------------------------------------|
| <i>PANS1</i>            | <i>PANS2</i> |            |                                  | <i>pans1 +/- pans2 +/-</i>        | <i>pans1 +/- pans2 +/- esp-P2156S -/-</i> | <i>pans1 +/- pans2 +/- esp-S606N -/-</i> |
| +/-                     | +/-          | 25         | 22                               | 21 (36)                           | 23 (39)                                   | 26 (41)                                  |
| +/-                     | +/+          | 12.5       | 22                               | 23 (38)                           | 24 (41)                                   | 20 (32)                                  |
| +/+                     | +/-          | 12.5       | 22                               | 25 (41)                           | 19 (32)                                   | 18 (29)                                  |
| +/+                     | -/-          | 6.25       | 11                               | 15 (25)                           | 10 (17)                                   | 13 (21)                                  |
| -/-                     | +/+          | 6.25       | 11                               | 9 (15)                            | 13 (22)                                   | 8 (13)                                   |
| +/+                     | +/+          | 6.25       | 11                               | 7 (12)                            | 12 (21)                                   | 13 (21)                                  |
| -/-                     | +/-          | 12.5       | 0                                | 0                                 | 0                                         | 0                                        |
| +/-                     | -/-          | 12.5       | 0                                | 0                                 | 0                                         | 0                                        |
| -/-                     | -/-          | 6.25       | 0                                | 0                                 | 0                                         | 0                                        |

**Table S2. *esp* mutations do not restore the gametophytic lethality of *pans1 pans2***

Among the selfing progeny of a *pans1 +/- pans2 +/-* plants, independent segregation of these unlinked loci predicts 6.25% of *pans1 -/- pans2 -/-* plants, 12.5% of both *pans1 +/- pans2 -/-* and 12.5% of *pans1 -/- pans2 +/-*. However, these genotypes were absent in the observed progeny, as previously described (Cromer et al, 2013), suggesting that the *pans1 pans2* gametophytes are not viable. Introducing the *esp-P2156S* or the *esp-S606N* mutation in the parental plant did not modify this segregation, the three genotypes being still absent. This shows that the *esp-P2156S* or the *esp-S606N* mutation is not able to restore the viability of neither male nor female *pans1 pans2* gametophytes.

|                                   |                  |                                        |                  |
|-----------------------------------|------------------|----------------------------------------|------------------|
| Panicum hallii var. hallii        | (PUZ76441.1)     | Triticum urartu                        | (EMS53671.1)     |
| Panicum hallii                    | (XP_025791674.1) | Amborella trichopoda                   | (XP_011620426.1) |
| Panicum miliaceum                 | (RLN07740.1)     | Brachypodium distachyon                | (KQK12869.2)     |
| Panicum miliaceum                 | (RLM78791.1)     | Hordeum vulgare subsp. vulgare         | (BAK00762.1)     |
| Oryza sativa Japonica Group       | (XP_015627424.1) | Aegilops tauschii subsp. tauschii      | (XP_020182268.1) |
| Oryza brachyantha                 | (XP_006647477.1) | Oryza sativa Japonica Group            | (BAD82353.1)     |
| Dichantherium oligosanthes        | (OEL17437.1)     | Sorghum bicolor                        | (XP_021302849.1) |
| Dichantherium oligosanthes        | (OEL20438.1)     | Zostera marina                         | (KMZ64751.1)     |
| Oryza brachyantha                 | (XP_015689052.1) | Dendrobium catenatum                   | (XP_020696164.1) |
| Zea mays                          | (NP_001132520.1) | Musa acuminata subsp. malaccensis      | (XP_009379917.1) |
| Panicum miliaceum                 | (RLM99188.1)     | Physcomitrella patens                  | (XP_024364912.1) |
| Zea mays                          | (ACG45876.1)     | Ostreococcus tauri                     | (XP_003084456.2) |
| Sorghum bicolor                   | (XP_002454142.1) | Phalaenopsis equestris                 | (XP_020591817.1) |
| Oryza sativa Indica Group         | (EAY86615.1)     | Dendrobium catenatum                   | (PKU68131.1)     |
| Phoenix dactylifera               | (XP_008791773.1) | Pomacea canaliculata                   | (XP_025093964.1) |
| Asparagus officinalis             | (XP_020261507.1) | Musa acuminata subsp. malaccensis      | (XP_018675059.1) |
| Asparagus officinalis             | (XP_020243818.1) | Phalaenopsis equestris                 | (XP_020596743.1) |
| Setaria italica                   | (XP_004953025.1) | Oryza sativa Indica Group              | (EAY76834.1)     |
| Phoenix dactylifera               | (XP_026656827.1) | Musa acuminata subsp. malaccensis      | (XP_018675061.1) |
| Elaeis guineensis                 | (XP_010912113.1) | Crassostrea virginica                  | (XP_022340323.1) |
| Zea mays                          | (NP_001142736.1) | Zostera marina                         | (KMZ59965.1)     |
| Panicum miliaceum                 | (RLN29265.1)     | Physcomitrella patens                  | (PNR27411.1)     |
| Zea mays                          | (AQK85829.1)     | Apostasia shenzhenica                  | (PKA64779.1)     |
| Elaeis guineensis                 | (XP_010912797.1) | Marchantia polymorpha                  | (PTQ28623.1)     |
| Brachypodium distachyon           | (XP_003575314.1) | Micractinium conductrix                | (PSC72275.1)     |
| Elaeis guineensis                 | (XP_019703807.1) | Oryza brachyantha                      | (XP_015690666.1) |
| Musa acuminata subsp. malaccensis | (XP_009402692.1) | Micractinium conductrix                | (PSC72274.1)     |
| Zea mays                          | (PWZ27380.1)     | Raphidocelis subcapitata               | (GBG00071.1)     |
| Hordeum vulgare subsp. vulgare    | (BAK07257.1)     | Chlorella sorokiniana                  | (PRW57261.1)     |
| Panicum hallii var. hallii        | (PUZ66070.1)     | Chlamydomonas eustigma                 | (GAX77848.1)     |
| Setaria italica                   | (XP_004962143.1) | Marchantia polymorpha subsp. ruderalis | (OAE27187.1)     |
| Ostreococcus lucimarinus CCE9901  | (XP_001422400.1) | Picea sitchensis                       | (ABK26784.1)     |
| Triticum turgidum subsp. durum    | (AIP89948.1)     | Coccomyxa subellipsoidea C-169         | (XP_005651938.1) |
| Panicum hallii                    | (XP_025808982.1) | Elaeis guineensis                      | (XP_010930199.1) |
| Musa acuminata subsp. malaccensis | (XP_009402691.1) | Elaeis guineensis                      | (XP_010930200.1) |
| Zea mays                          | (XP_008647649.1) | Acropora digitifera                    | (XP_015753966.1) |
| Triticum urartu                   | (EMS47367.1)     | Ostreococcus tauri                     | (OUS44868.1)     |
| Aegilops tauschii subsp. tauschii | (XP_020173028.1) | Orbicella faveolata                    | (XP_020600834.1) |
| Zea mays                          | (NP_001158919.1) | Crassostrea gigas                      | (EKC30626.1)     |
| Zea mays                          | (AQK85830.1)     | Asparagus officinalis                  | (ONK57046.1)     |
| Apostasia shenzhenica             | (PKA64761.1)     | Zea mays                               | (ACG33508.1)     |
| Elaeis guineensis                 | (XP_019702503.1) | Crassostrea gigas                      | (XP_011441394.1) |
| Phoenix dactylifera               | (XP_026660708.1) | Pocillopora damicornis                 | (RMX43805.1)     |
| Musa acuminata subsp. malaccensis | (XP_009404273.1) | Selaginella moellendorffii             | (XP_024519951.1) |
| Musa acuminata subsp. malaccensis | (XP_009404272.1) | Selaginella moellendorffii             | (XP_024540162.1) |
| Zea mays                          | (PWZ17396.1)     | Zea mays                               | (ACG37554.1)     |
| Asparagus officinalis             | (ONK79989.1)     | Stylophora pistillata                  | (XP_022807112.1) |
| Amborella trichopoda              | (ERM98247.1)     | Orbicella faveolata                    | (XP_020600847.1) |
| Oryza sativa Japonica Group       | (XP_015624021.1) | Lottia gigantea                        | (XP_009062812.1) |
| Phoenix dactylifera               | (XP_026660705.1) | Apostasia shenzhenica                  | (PKA58368.1)     |
| Ananas comosus                    | (XP_020111360.1) | Saccoglossus kowalevskii               | (XP_002742390.1) |
| Phoenix dactylifera               | (XP_026660702.1) | Pyrus x bretschneideri                 | (XP_009363238.1) |
| Ananas comosus                    | (OAY72878.1)     | Lingula anatina                        | (XP_013412898.1) |
| Asparagus officinalis             | (ONK72469.1)     | Biomphalaria glabrata                  | (XP_013082550.1) |
| Ananas comosus                    | (XP_020111359.1) | Ostreococcus tauri                     | (OUS44952.1)     |
| Mizuhopecten yessoensis           | (XP_021355525.1) | Exaiptasia pallida                     | (XP_020908213.1) |
| Zostera marina                    | (KMZ64759.1)     | Biomphalaria glabrata                  | (XP_013082549.1) |
| Acropora digitifera               | (XP_015760873.1) | Priapulius caudatus                    | (XP_014665187.1) |

**Table S3.** Homologues detected by PSI-BLAST with the green alga *Ostreococcus lucimarinus* CCE9901 (XP\_001422400.1) as the input sequence. The hits have been ordered by increasing e-values ranging from  $4e^{-57}$  to  $1e^{-05}$  after 10 iterations.

Absolute read counts. Read counts normalized by Med. Format: average value.

|                                                     | AT5G12360<br><i>PANS2</i> | AT3G14190<br><i>PANS1</i> | ratio<br><i>PANS1/PANS2</i> |
|-----------------------------------------------------|---------------------------|---------------------------|-----------------------------|
| Seedling meristem                                   | 126                       | 2097                      | 16.6                        |
| Meristem at 11 days after germination               | 177                       | 1988                      | 11.2                        |
| Inflorescence meristem at 15 days after germination | 173                       | 1811                      | 10.5                        |
| Seeds 1                                             | 369                       | 1648                      | 4.5                         |
| Inflorescence meristem at 14 days after germination | 147                       | 1538                      | 10.5                        |
| Inflorescence meristem at 16 days after germination | 131                       | 1519                      | 11.6                        |
| Flower 19+                                          | 110                       | 1517                      | 13.8                        |
| Carpels of the young flower                         | 127                       | 1515                      | 11.9                        |
| Meristem at 10 days after germination               | 200                       | 1440                      | 7.2                         |
| Meristem at 12 days after germination               | 136                       | 1314                      | 9.7                         |
| Flower 9-11                                         | 102                       | 1310                      | 12.8                        |
| Ovules from 6th and 7th flowers                     | 136                       | 1287                      | 9.5                         |
| SAM at 8 days after germination                     | 132                       | 1272                      | 9.6                         |
| SAM at 9 days after germination                     | 130                       | 1266                      | 9.7                         |
| Young seeds 5                                       | 119                       | 1266                      | 10.6                        |
| Flower 15-18                                        | 102                       | 1235                      | 12.1                        |
| Inflorescence meristem at 13 days after germination | 135                       | 1226                      | 9.1                         |
| SAM at 7 days after germination                     | 414                       | 1200                      | 2.9                         |
| Leaf blade of the young leaf                        | 137                       | 1148                      | 8.4                         |
| Petiole of the young leaf                           | 58                        | 1144                      | 19.7                        |
| Axis of the inflorescence                           | 81                        | 1056                      | 13.0                        |
| Young seeds 4                                       | 111                       | 908                       | 8.2                         |
| Carpels of the mature flower (before pollination)   | 95                        | 899                       | 9.5                         |
| Young seeds 3                                       | 139                       | 897                       | 6.5                         |
| Flower 12-14                                        | 91                        | 879                       | 9.7                         |
| Young seeds 2                                       | 106                       | 872                       | 8.2                         |
| Seeds 3                                             | 289                       | 864                       | 3.0                         |
| Petiole, intermediate 1                             | 80                        | 856                       | 10.7                        |
| Seeds 5                                             | 319                       | 769                       | 2.4                         |
| Carpel of 6th and 7th flowers                       | 66                        | 696                       | 10.5                        |
| Young seeds 1                                       | 98                        | 693                       | 7.1                         |
| Flower 6-8                                          | 83                        | 617                       | 7.4                         |
| Silique 2                                           | 172                       | 568                       | 3.3                         |
| Silique 4                                           | 157                       | 563                       | 3.6                         |
| Flower 2                                            | 51                        | 562                       | 11.0                        |
| Pedicele                                            | 76                        | 525                       | 6.9                         |
| Flower 4                                            | 66                        | 500                       | 7.6                         |
| Flower 1                                            | 70                        | 496                       | 7.1                         |
| Flower 5                                            | 72                        | 492                       | 6.8                         |
| Seeds 7                                             | 150                       | 488                       | 3.3                         |
| Anthers of the young flower                         | 93                        | 457                       | 4.9                         |
| Leaf blade, intermediate 1                          | 68                        | 432                       | 6.4                         |
| Flower 3                                            | 60                        | 378                       | 6.3                         |
| Silique 6                                           | 118                       | 348                       | 2.9                         |
| Root without apex                                   | 90                        | 343                       | 3.8                         |
| Root apex                                           | 102                       | 337                       | 3.3                         |
| Germinating seeds 3 (third day after soaking)       | 78                        | 332                       | 4.3                         |
| Silique 8                                           | 68                        | 289                       | 4.3                         |
| Seedling root                                       | 84                        | 251                       | 3.0                         |
| Sepals of the young flower                          | 63                        | 248                       | 3.9                         |
| Seedling cotyledons                                 | 71                        | 242                       | 3.4                         |
| Internode                                           | 56                        | 237                       | 4.2                         |
| Pod of the silique 1                                | 71                        | 232                       | 3.3                         |
| Pod of the silique 3                                | 96                        | 226                       | 2.4                         |
| Petals of the mature flower                         | 32                        | 194                       | 6.1                         |
| Pod of the silique 5                                | 79                        | 168                       | 2.1                         |

|                                                |             |              |            |
|------------------------------------------------|-------------|--------------|------------|
| Petiole, intermediate 2                        | 55          | 158          | 2.9        |
| Dry seeds                                      | 118         | 147          | 1.2        |
| Leaf vein, intermediate 2                      | 53          | 143          | 2.7        |
| Pod of the silique 7                           | 56          | 129          | 2.3        |
| Germinating seeds 2 (second day after soaking) | 57          | 122          | 2.1        |
| Seedling hypocotyl                             | 66          | 118          | 1.8        |
| Stamen filaments of the mature flower          | 26          | 116          | 4.5        |
| Leaf blade, intermediate 2                     | 52          | 113          | 2.2        |
| Anthers of the mature flower (before opening). | 75          | 90           | 1.2        |
| Petiole of the mature leaf                     | 36          | 85           | 2.4        |
| Opened anthers                                 | 20          | 79           | 4.0        |
| Stigmatic tissue                               | 57          | 72           | 1.3        |
| Vein of the mature leaf                        | 40          | 71           | 1.8        |
| Seeds of first yellowing silique.              | 79          | 66           | 0.8        |
| Sepals of the mature flower                    | 21          | 65           | 3.1        |
| Germinating seeds 1 (first day after soaking)  | 124         | 59           | 0.5        |
| Whole mature leaf                              | 26          | 55           | 2.1        |
| Senescent silique 2                            | 64          | 53           | 0.8        |
| Vein of the senescent leaf                     | 30          | 33           | 1.1        |
| Leaf blade of the mature leaf                  | 28          | 29           | 1.0        |
| Petiole of the senescent leaf                  | 10          | 28           | 2.8        |
| Senescent internode.                           | 30          | 27           | 0.9        |
| Pod of the senescent silique 1.                | 13          | 16           | 1.2        |
| <b>Total</b>                                   | <b>7898</b> | <b>49529</b> | <b>6.3</b> |

**Table S4. Expression levels of PANS1 and PANS2.**

Absolute read counts. Read counts normalized by Med. Format: average value.

Data from Klepikova et al, BMC genomics 2015. Retrieved from

<http://travadb.org/>



**Movie S1. Time course of male meiosis I in wild type.**

Anthers at meiotic stages were observed in plant expressing the TUBULIN BETA CHAIN 4 fused with the RED FLUORESCENT PROTEIN (RFP:TUB4) and the cohesin REC8 fused with the GREEN FLUORESCENT protein (REC8:GFP). Scale bar= 10  $\mu$ M.

**Movie S2 and S3. Time course of male meiosis in *pDMC1::PANS1 $\Delta$ D*.**

Anthers at meiotic stages were observed in plants expressing RFP:TUB4, REC8:GFP and *pDMC1::PANS1 $\Delta$ D*. Scale bar= 10  $\mu$ M.
